# Supplementary material for: Present Food Shopping Habits in the Spanish Adult Population: A Cross-Sectional Study
Source: MDPI journal article supplement (doi:10.3390/nu9050508), 2017-05-18
Supplement: s1 [file s1]

# Present Food Shopping Habits in the Spanish Adult Population: A Cross-Sectional Study

María Achón <sup>1</sup>, María Serrano <sup>1</sup>, Ángela García-González <sup>1</sup>, Elena Alonso-Aperte <sup>1</sup> and Gregorio Varela-Moreiras <sup>1,2,\*</sup>

## 1. Questionnaire on Food Shopping Habits

### 1.1. Sociodemographic Data

| Q.1. Gender: | code |
|--------------|------|
| Male         | 1    |
| Female       | 2    |

| Q.2. How old are you? Age: | code |
|----------------------------|------|
| 18-30 y                    | 1    |
| 31-49 y                    | 2    |
| 50-64 y                    | 3    |
| 65-75 y                    | 4    |
| >75 y                      | 5    |

| Q.3. Where do you live?<br>Province: _____<br>City/Village: _____<br>Habitat size | code |
|-----------------------------------------------------------------------------------|------|
| < 2,000 inhabitants                                                               | 1    |
| 2,001-10,000 inhabitants                                                          | 2    |
| 10,001-100,000 inhabitants                                                        | 3    |
| 100,001-500,000 inhabitants                                                       | 4    |
| > 500,000 inhabitants                                                             | 5    |

| Q.4. Nationality | code |
|------------------|------|
| Spanish          | 1    |
| Other: _____     | 2    |

| Q.5. Employment Status: Are you currently...? | code |
|-----------------------------------------------|------|
| Self-employed                                 | 1    |
| Working for others                            | 2    |
| Housewife (domestic work)                     | 3    |
| Unemployed (Go to Question Q.5.1)             | 4    |
| Student                                       | 5    |
| Retired                                       | 6    |
| Other: _____                                  | 7    |

| Q.5.1. For how long you have been unemployed? |  |
|-----------------------------------------------|--|
| _____                                         |  |

### 1.2. Food Shopping Habits

| Q.6. Is there a food store in your living area? | code |
|-------------------------------------------------|------|
| Yes                                             | 1    |
| No                                              | 0    |

| Q.7. Are you the person in charge of food shopping at your home? |   |
|------------------------------------------------------------------|---|
| I am 100% in charge                                              | 1 |
| I am 50% in charge                                               | 2 |
| I am < 50% in charge                                             | 3 |
| I am in charge occasionally                                      | 4 |
| I am not involved in food shopping                               | 5 |

| Q.8. Which is your monthly budget for food shopping? |   |
|------------------------------------------------------|---|
| <150 euros                                           | 1 |
| 150-300 euros                                        | 2 |
| 301-450 euros                                        | 3 |
| 451-600 euros                                        | 4 |
| > 600 euros                                          | 5 |

If Q.7 = 1 or 2, go to Q.8

If Q.7 ≠ 1 or 2, you are finished.

| Q.9. Have you recently changed your shopping habits due to the current economic situation? | YES | NO |
|--------------------------------------------------------------------------------------------|-----|----|
| I buy cheaper food products                                                                | 1   | 0  |
| I buy more generic or distribution brand                                                   | 1   | 0  |
| I look for low-cost food- shops                                                            | 1   | 0  |

|                                              |   |   |
|----------------------------------------------|---|---|
| I cook at home and take my lunch-box to work | 1 | 0 |
| I do not eat out so often                    | 1 | 0 |
| I skip one meal (_____)                      | 1 | 0 |
| I buy less fresh foods (fruits, vegetables)  | 1 | 0 |
| I buy less meat and fish                     | 1 | 0 |
| I don't go out for snacking or appetizers    | 1 | 0 |
| I don't go out to have a drink               | 1 | 0 |
| I had to ask for food aid support            | 1 | 0 |

| Q.10. Do you buy different foods depending on the day of the month (beginning vs end)? | code | Q.11. Do you buy in different shops depending on the day of the month (beginning vs end)? | code |
|----------------------------------------------------------------------------------------|------|-------------------------------------------------------------------------------------------|------|
| Yes                                                                                    | 1    | Yes                                                                                       | 1    |
| No                                                                                     | 0    | No                                                                                        | 0    |

| Q.12. How frequently do you buy fresh foods? (one choice) | code |
|-----------------------------------------------------------|------|
| Daily                                                     | 1    |
| 3-4 times per week                                        | 2    |
| 2-3 times per week                                        | 3    |
| Once a week (Monday to Friday)                            | 4    |
| Usually on weekends                                       | 5    |
| Biweekly                                                  | 6    |
| Once a month                                              | 7    |
| Sporadically                                              | 8    |

| Q.13. How frequently do you buy non-perishable foods? (one choice) | code |
|--------------------------------------------------------------------|------|
| Daily                                                              | 1    |
| 3-4 times per week                                                 | 2    |
| 2-3 times per week                                                 | 3    |
| Once a week (Monday to Friday)                                     | 4    |
| Usually on weekends                                                | 5    |
| Biweekly                                                           | 6    |
| Once a month                                                       | 7    |
| Sporadically                                                       | 8    |

| Q.14. Where do you prefer to buy fresh foods? (one choice) | code |
|------------------------------------------------------------|------|
| Traditional Markets                                        | 1    |
| Neighbourhood food stores                                  | 2    |
| Supermarkets                                               | 3    |
| Supercentres                                               | 4    |
| 24h Shops                                                  | 5    |
| Internet                                                   | 6    |
| Direct from suppliers                                      | 7    |
| Organic food shops                                         | 8    |
| Own production                                             | 9    |
| Other (_____)                                              | 10   |

| Q.15. Where do you prefer to buy non-perishable foods? (one choice) | code |
|---------------------------------------------------------------------|------|
| Traditional Markets                                                 | 1    |
| Neighbourhood food stores                                           | 2    |
| Supermarkets                                                        | 3    |
| Supercentres                                                        | 4    |
| 24h Shops                                                           | 5    |
| Internet                                                            | 6    |
| Direct from suppliers                                               | 7    |
| Organic food shops                                                  | 8    |
| Own production                                                      | 9    |
| Other (_____)                                                       | 10   |

| Q.16. What are the reasons why you prefer that kind of retail store to buy your fresh food items? (multiple choice). | code |
|----------------------------------------------------------------------------------------------------------------------|------|
| Because of food product quality                                                                                      | 1    |
| Because of variety                                                                                                   | 2    |
| Because of the price                                                                                                 | 3    |
| Because of freshness                                                                                                 | 4    |
| Because of availability                                                                                              | 5    |
| Because of proximity to home                                                                                         | 6    |
| Because of convenience (home delivery)                                                                               | 7    |
| Due to the products' origin                                                                                          | 8    |
| Other (_____)                                                                                                        | 9    |

| Q.17. What are the reasons why you prefer that kind of retail store to buy your non-perishable food items? (multiple choice). | code |
|-------------------------------------------------------------------------------------------------------------------------------|------|
| Because of food product quality                                                                                               | 1    |
| Because of variety                                                                                                            | 2    |
| Because of the price                                                                                                          | 3    |
| Because of freshness                                                                                                          | 4    |
| Because of availability                                                                                                       | 5    |
| Because of proximity to home                                                                                                  | 6    |
| Because of convenience (home delivery)                                                                                        | 7    |
| Due to the products' origin                                                                                                   | 8    |
| Other (_____)                                                                                                                 | 9    |

| Q.18 Which of the following habits/activities do you usually perform while food shopping?? | YES | NO |
|--------------------------------------------------------------------------------------------|-----|----|
| You check the “best before” date label                                                     | 1   | 0  |
| You check the nutritional facts label                                                      | 1   | 0  |
| You bring a food shopping list with you                                                    | 1   | 0  |
| You choose environmentally friendly foods                                                  | 1   | 0  |
| You look for food discounts and coupons                                                    | 1   | 0  |
| You compare prices                                                                         | 1   | 0  |
| You look for healthier foods                                                               | 1   | 0  |
| You buy value-added- foods (omega-3 enriched; + bifidus)                                   | 1   | 0  |

|                                                                                                       |
|-------------------------------------------------------------------------------------------------------|
| Q.19. How much time do you spend on food shopping (from “leaving home” to “food in the fridge”) (min) |
| _____                                                                                                 |

|                                                                             |      |
|-----------------------------------------------------------------------------|------|
| Q.20. Do you feel you have enough time for food shopping and cooking meals? | code |
| Yes                                                                         | 1    |
| No                                                                          | 0    |

|                                                                                                       |      |
|-------------------------------------------------------------------------------------------------------|------|
| Q.21. Does traditional food advertising (TV, radio, press) have an influence on your shopping habits? | code |
| Yes                                                                                                   | 1    |
| No                                                                                                    | 0    |

|                                                                                                     |      |
|-----------------------------------------------------------------------------------------------------|------|
| Q.22. And the information on the Internet and Social Media, does it influence your shopping habits? | code |
| Yes                                                                                                 | 1    |
| No                                                                                                  | 0    |

| Q.23. Please rate from 1 to 10 how health consciousness influences your food shopping habit, being 1 “no influence at all” and 10 “very high influence”. |   |                      |   |              |   |                |   |                     |    |
|----------------------------------------------------------------------------------------------------------------------------------------------------------|---|----------------------|---|--------------|---|----------------|---|---------------------|----|
| No influence at all                                                                                                                                      |   | Very small influence |   | Intermediate |   | High influence |   | Very high influence |    |
| 1                                                                                                                                                        | 2 | 3                    | 4 | 5            | 6 | 7              | 8 | 9                   | 10 |
|                                                                                                                                                          |   |                      |   |              |   |                |   |                     |    |

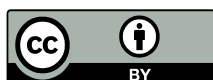

© 2016 by the authors; licensee MDPI, Basel, Switzerland. This article is an open access article distributed under the terms and conditions of the Creative Commons by Attribution (CC-BY) license (<http://creativecommons.org/licenses/by/4.0/>).
